# Supplementary material
Source: publisher figshare collection journal article supplement (https://frontiersin.figshare.com/ndownloader/files/25627952)
Supplement: Supplementary file 1 [file 25627952]

| **Sample region (country)** | **Observatory-ID** | **ARMS-ID** | **Geolocations**  **latitude, longitude** | **Depth (m)** | **Monitoring**  **area** | **Deployment periods starting in 2018** | **Deployment periods**  **starting in 2019** | **Deployment periods**  **starting in 2020** |
| --- | --- | --- | --- | --- | --- | --- | --- | --- |
| Antarctica (UK) | Rothera | HangarCove1  HangarCove2  HangarCove3  South Cove1  Cheshire1 | -67.5641667, -68.1249667  -67.5641667, -68.1249667  -67.5641667, -68.1249667  -67.5750000, -68.1346667  -67.5738333, -68.1252333 | 12  12  12  21  20 | LTER site  LTER site  LTER site  LTER site  LTER site | -  -  -  -  - | 2019-07-08 – 2021-06-??  2019-07-08 – 2021-06-??  2019-07-08 – 2021-06-??  2019-08-29 – 2021-06-??  2019-12-10 – 2021-06-?? | -  -  -  -  - |
| British channel (UK) | Plymouth | MBA1  MBA2  MBA1A  MBA1B  MBA1C | 50.3674, -4.1552  50.350134, -4.159167  50.3673, -4.1554  50.3668, -4.1561  50.3674, -4.1544 | 1  10  2  2  2 | Marina  Marina  Marina  Marina  Marina | 2018-07-01 – 2018-10-01  2018-07-01 – 2018-10-01  -  -  - | -  -  2019-07-16 -- 2019-09-16  2019-07-16 -- 2019-09-18  2019-07-16 -- 2019-09-20 | -  -  2020-07-13 – 2020-09-21  2020-07-13 – 2020-09-23  2020-07-13 – 2020-09-25 |
| British channel (France) | Roscoff | MarBloR1  MarBloR2  MarBloR3  BasBloS1  BasBloS2  BasBloS3 | 48.71751, -3.96649  48.71751, -3.96649  48.71751, -3.96649  48.72872, -3.95894  48.72872, -3.95894  48.72872, -3.95894 | 1  1  1  12  12  12 | Marina  Marina  Marina  MPA  MPA  MPA | 2018-07-09 – 2018-10-24  -  -  2018-07-11 – 2018-10-25  -  - | 2019-06-12 -- 2019-09-16  2019-06-12 -- 2019-09-17  2019-06-12 -- 2019-09-18  2019-06-12 – 2020-05-??  2019-06-12 -- 2020-05-??  2019-06-12 -- 2020-05-?? | 2020-06-?? -- 2020-09-??  2020-06-?? -- 2020-09-??  2020-06-?? -- 2020-09-??  2020-05-?? – 2021-05-??  2020-05-?? – 2021-05-??  2020-05-?? – 2021-05-?? |
| Atlantic coast (Spain) | Vigo | TorallaA  TorallaB  TorallaC | 42.233333, -8.783333  42.233333, -8.783333  42.233333, -8.783333 | 12  12  12 | Industrial port  Industrial port  Industrial port | 2018-06-07 -- 2018-09-24  -  - | 2019-06-25 – 2019-10-14  2019-06-25 – 2019-10-14  2019-06-25 – 2019-10-14 | 2020-06-?? -- 2020-09-??  2020-06-?? -- 2020-09-??  2020-06-?? -- 2020-09-?? |
| Baltic Sea (Finland) | TZS | Angbat  Spikarna | 59.841505, 23.248879  59.81094, 23.206216 | 4  3 | MPA, LTER site  MPA, LTER site | 2018-07-11 – 2018-11-06  2018-07-11 – 2018-11-07 | -  - | 2020-06-?? -- 2020-10-??  2020-06-?? -- 2020-10-?? |
| Mediterranean (Slovenia) | GulfOfPiran | Loc1  Loc1  Loc2Vida22  Loc2Vida22  KPLK1  KPLK2 | 45.5188, 13.5673  45.5188, 13.5673  45.54875, 13.5507  45.54875, 13.5507  45.564856, 13.743586  45.564856, 13.743586 | 9  9  22  22  3  3 | Research site  Research site  LTER site  LTER site  Industrial port  Industrial port | 2018-08-15 – 2018-11-18  2018-08-15 -- 2019-02-15  -  -  -  - | 2019-07-02 -- 2020-01-27  2019-07-02 – 2020-??-??  2019-07-11 -- 2020-01-31  2019-07-11 – 2020-06-??  -  - | -  -  --  -  2020-06-22 -- 2020-10-??  2020-06-?? -- 2021-05-?? |
| Svalbard  (Norway) | Svalbard | S1  S2 | 78.21302778, 15.23361111  78.18833333, 15.14472222 | 14  14 | LTER site  LTER site | 2018-07-06 -- 2019-08-06  2018-07-08 -- 2019-08-05 | 2019-08-06 -- 2020-08-06  2019-08-05 -- 2020-08-05 | 2020-08-05 -- 2021-08-06  2020-08-06 -- 2021-08-07 |
| Baltic Sea (Poland) | Gdynia | GDY1 | 54.48522, 18.57111 | 4 | LTER site, MPA | 2018-08-13 -- 2019-10-29 | 2019-06-19 -- 2019-10-29 | 2020-06-10 – 2021-09-30 |
| North Sea Skagerrak (Sweden) | Koster | VH1  VH2  VH3 | 58.875155, 11.103194  58.876330, 11.111884  58.859877, 11.080491 | 24  22  25 | MPA  MPA  MPA | 2018-04-18 -- 2019-05-27  **2018-04-18 – 2018-09-06**  2018-04-18 -- 2019-05-27 | 2019-05-27 – 2020-07-??  2019-05-27 – 2020-07-??  2019-05-27 – 2020-07-?? | 2020-06-?? – 2021-05-??  2020-06-?? – 2021-05-??  2020-06-?? – 2021-05-?? |
| North Sea Kattegat (Sweden) | SwedishWestCoast | Preemraff1  Preemraff2  Marstrand1  Marstrand2  Marstrand3  Helsingborg1  Helsingborg2  Varberg1  Varberg2  Varberg3  Gbg1  Gbg2  Gbg3  Gbg4  Bjorko1  Hjuvik1 | 58.3533, 11.43486  58.35405, 11.43394  57.914434, 11.594154  57.903512, 11.581548  57.889278, 11.585722  56.026272, 12.695728  56.018061, 12.700541  57.1133741, 12.2299832  57.1126278, 12.23027320  57.1107004, 12.2439775  57.664805, 11.714735  57.664608, 11.732876  57.680533, 11.740578  57.680805, 11.728331  57.717984, 11.679989  57.703221, 11.711363 | 3  3  5  5  5  2  2  2  2  2  6  24  8  6  2  2 | Industrial port  Industrial port  Marina  Marina  Marina  Industrial port  Industrial port  Industrial port  Industrial port  Industrial port  Industrial port  Industrial port  Industrial port  Industrial port  Marina  Marina | -  -  -  -  -  -  -  -  -  -  -  -  -  -  -  - | -  -  -  -  -  -  -  -  -  -  -  -  -  -  -  - | 2020-04-01 -- 2020-06-10  2020-04-01 -- 2020-06-10  2020-02-28 -- 2020-05-27  2020-02-28 -- 2020-05-27  2020-02-28 -- 2020-05-27  2020-03-05 -- 2020-06-04  2020-03-05 -- 2020-06-04  2020-02-13 -- 2020-06-03  2020-02-13 -- 2020-06-03  2020-02-13 -- 2020-06-03  2020-02-06 -- 2020-05-20  2020-02-06 -- 2020-05-20  2020-02-06 -- 2020-05-29  2020-02-06 -- 2020-05-29  2020-01-31 -- 2020-05-18  2020-01-31 -- 2020-05-18 |
| North Sea (Belgium) | BelgianCoast | AZFPout  AZFPin  ZBE1  ZBW1  JJC81  JJC86  JJCD78 | 51.68821, 2.84921  51.66522, 2.82558  51.364298, 3.20701  51.362906, 3.183634  51.6533567, 2.79178508  51.6526400, 2.79369998  51.65374944, 2.79602577 | 38  37  7  12  38  37  38 | Wind farm  Wind farm  Marina  Marina  Wind farm  Wind farm  Wind farm | 2018-07-12 – 2018-08-18  2018-07-12 – 2018-08-18  -  -  -  -  - | -  -  2019-09-24 -- 2020-03-03  2019-09-24 -- 2020-03-03  -  -  - | -  -  -  -  2020-05-13 -- 2020-??-??  2020-05-13 -- 2020-??-??  2020-05-13 -- 2020-??-?? |
| Mediterranean (Greece) | Crete | 1HERP  1HERP  1HERP  2UBPC | 35.343153, 25.136605  35.343153, 25.136605  35.343153, 25.136605  35.34662, 25.27876 | 4  4  4  21 | Marina/Harbour  Marina/Harbour  Marina/Harbour  UBP | **2018-09-28 – 2019-01-28**  -  -  - | 2019-06-12 – 2019-10-11  2019-06-12 -- 2020-02-10  2019-06-12 -- 2020-06-18  2019-09-24 -- 2020-10-?? | 2020-09-04 -- 2021-01-??  2020-09-04 -- 2021-05-??  2020-09-04 -- 2021-09-??  2020-11-?? -- 2021-11-?? |
| Gulf of Aqaba (Israel) | Eilat | NR  Katza | 29.5, 34.9  29.52, 34.93 | 10  10 | LTER site  Industrial port | 2018-10-17 -- 2020-02-03  2018-10-24 -- 2020-05-?? | -  - | 2020-05-?? – 2021-05-??  2020-05-?? – 2021-05-?? |
| West Greenland (Greenland) | Nuuk | Nuuk1  Nuuk2  Nuuk3 | 64.14, -51.39  64.14, -51.39  64.14, -51.39 | 15  15  15 | LTER site  LTER site  LTER site | -  -  - | 2019-07-14 -- 2021-07-??  2019-07-14 -- 2021-07-??  2019-07-14 -- 2021-07-?? | -  -  - |
| East Greenland (Greenland) | Daneborg | Daneborg1  Daneborg2  Daneborg3 | 74.33, -20.34  74.33, -20.34  74.33, -20.34 | 15  15  15 | LTER site  LTER site  LTER site | -  -  - | 2019-07-14 -- 2021-08-??  2019-07-14 -- 2021-08-??  2019-07-14 -- 2021-08-?? | -  -  - |
| North Sea (Denmark) | Limfjord | Yellow8  Yellow8  Green33  Green33  Red2  Red2 | 56.902366, 9.055797  56.902366, 9.055797  56.901246, 9.058189  56.901246, 9.058189  56.89985, 9.05663333  56.89985, 9.05663333 | 4  4  4  4  4  4 | LTER site  LTER site  LTER site  LTER site  LTER site  LTER site | -  -  -  -  -  - | 2019-06-18 -- 2019-10-29  2019-10-29 -- 2020-09-??  2019-06-18 -- 2019-10-29  2019-10-29 -- 2020-09-??  2019-06-18 -- 2019-10-29  2019-10-29 -- 2020-09-?? | -  2020-09-?? – 2021-09-??  -  2020-09-?? – 2021-09-??  -  2020-09-?? – 2021-09-?? |
| North Sea Kattegat (Denmark) | Laeso | Bluereef1  Bluereef2  Bluereef3 | 57.25689, 11.14193  57.25692, 11.14197  57.25692, 11.14199 | 10  10  10 | LTER site  LTER site  LTER site | -  -  - | 2019-08-19 -- 2020-09-??  2019-08-19 -- 2020-09-??  2019-08-19 -- 2020-09-?? | 2020-09-?? – 2021-09-??  2020-09-?? – 2021-09-??  2020-09-?? – 2021-09-?? |
| Bay of Biscay (Spain) | Getxo | G1  G2  G3 | 43.338452, -3.014833  43.3385, -3.01491  43.33843, -3.014830 | 5  5  5 | Marina  Marina  Marina | -  -  - | 2019-06-24 –2019-10-16  2019-06-24 –2019-10-16  2019-06-24 –2019-10-16 | 2020-06-?? -- 2020-10-??  2020-06-?? -- 2020-10-??  2020-06-?? -- 2020-10-?? |
| Altantic coast (Norway) | Bodø | GStraM  GStraB | 14.711533, 67.240217  14.711733, 67.24035 | 2  2 | MPA  MPA | -  - | 2019-06-19 -- 2020-06-25  2019-06-19 -- 2020-06-25 | 2020-07-05 -- 2021-07-??  2020-07-05 -- 2021-07-?? |
| Atlantic coast  (Ireland) | Galway | Gurr1  Gurr2  Gurr3  Gurr4 | 53.315693, -9.670278  53.315693, -9.670278  53.315693, -9.670278 | 8  8  8 | SAC  SAC  SAC | -  -  - | -  -  - | 2020-07-21 – 2020-10-??  2020-07-21 – 2020-10-??  2020-07-23 – 2020-10-??  2020-07-23 – 2020-10-?? |

## Supplementary Table 1. Overview of observatories and sample events from the ARMS-MBON pilot phase. Sample events indicated in bold are available under the open access license CC BY 4.0. Data from all remaining as well as future sample events will become automatically available under the same license after a moratorium period of one year. Explanation of abbreviations: LTER - Long-term Ecological Research, NIS - Non-Indigenous Species, MPA – Marine Protected Area, SAC – Special Area of Conservation, UBP - Underwater Biotechnology Park, Observatory-ID - unique identifier for the observatory, ARMS-ID - unique identifier for the ARMS site. Please note, some deployments periods in 2019-2020 are longer than originally planned due to COVID-19 restrictions on travel and diving.
